# Supplementary material for: Identification of HSP47 Binding Site on Native Collagen and Its Implications for the Development of HSP47 Inhibitors
Source: Biomolecules. 2021 Jul 3;11(7):983. doi: 10.3390/biom11070983 (PMC8301893; doi:10.3390/biom11070983)
Supplement: Supplementary file 1 [file biomolecules-11-00983-s001.zip › biomolecules-1274422-supplementary.pdf]

## Supplementary Materials

(a)

II-20 II-17 II-13, II-14 II-10, II-11

GPMGPMGPRGPPGPAGAPGPQGFQGNPGEPGEPGVSGPMGPRGPPGPPGKPGDDGEAGKPGKA~~GER~~GPP  
 GPQ~~GARG~~FPGTPTGLPGVK~~GHR~~YPLDGAKEAGAPGVKGESGSPGENSGPMP~~GPR~~GLP~~GER~~GRTGPA  
 GAA~~GARG~~GNDGQPGPAGPPGPVGPAGGPGFPGAPGAKGEAGPT~~GARG~~PEGAQ~~GPR~~GEPGTPGSPGPAGAS  
 GNP~~GTDGIP~~GA~~KGS~~AGAPGIAGAPGFP~~GPR~~GPPGPQGATGPLGPKGQTGEPIAGFKGEQGPKEGEPGAP  
 QGAPGPAGE~~GKRGARG~~EPGGVGP~~IGPP~~~~GER~~GAP~~GNG~~FPGQDGLAGPKGAP~~GER~~GPSGLAGPK~~GANGDP~~  
 GRPGEPLP~~GARG~~GLTGRPGDAGPQGVGPGSAP~~GER~~DGRPGPPGPQ~~GARG~~GQPGVMGFPGPKGANGEP~~GK~~  
 AGEKGLPGAP~~GLR~~GLPGKDGETGAA~~GPP~~GPAGPA~~GER~~GEQGA~~PPSGF~~QGLPGPPGPPGEG~~GK~~PGDQGV  
 GEAGAPGLV~~GPRGER~~GFP~~GER~~SGPAQGLQ~~GPR~~GLPGTPTDGPKGASGPAGPPGAQGPPLQGMP~~GER~~  
 GAAGIAGPK~~GDR~~GDVGEKGPEGAPGKDGGRLTGPIPPGPAGANGEKGEVGPMPAGSAG~~GARG~~AP~~GER~~  
 GETGPPGPAGFAGPPGADGQPGAKGEQGEAGQKGDAGAPGPQGPSGAPGPQGTGVTGPK~~GARGA~~QGP  
 GATGFPGAAGRVGPPGS~~GN~~PGPPGPPSGKDGP~~KARG~~DSGPPGRAGEPLQGPAGPPGEKGEPGDDG  
 PSGAEGPPGPQGLA~~GQR~~GIVGLP~~QQR~~GERGFPGLPGSPGEPGKQAGPAS~~GDR~~GPPGPVGPGLTGAPGE  
 GREGSPGADGPPGRDGAAGVK~~GDR~~GETGAVGAPGAPGPPGSPGPAGPTGKQ~~GDR~~GEAGAQQPMGPSGP  
 A~~GARG~~IQGPQ~~GPR~~GDKGEAGEP~~GER~~GLK~~GHR~~GFTGLQLPGPPGPSGDQGASGPAGPS~~GPR~~GPPGPVGPS  
 GKDGANGIPGPPIGPP~~GPR~~GRSGETGPAGPPGNPGPPGPPGP

II-39 II-24 II-26

(b)

III-14 III-5

GIPGRNGDPGIPGQPGSPGSPGPPGICESCTGPNQYSPQYDSYDVKSGVAVGGLAGYGPAGPPGPPGPGTS  
 GHPGSPGSPGYQGGPEPGQAGPSGPPGPPGAIGPSGPAKGDGESGRPGRP~~GER~~GLPGPPGIKGPAGIPGFPG  
 MK~~GHR~~GFDGRNGEKGETGAPGLKGENGLPGENGAPGPM~~GPR~~GAP~~GER~~GRPLPGAA~~GARG~~GND~~GARG~~SD  
 GQPGPPGPPGTAGFPSPGAKGEVGPAGSPGSNGAP~~GQR~~GEPGPQGHAGAQQPPGPPGINGSPPGKGEMGP  
 AGIPGAPGLM~~GARG~~GPPGPAGANGAP~~GLR~~GGAGEPGKNGAKGEP~~GPRGER~~GEAGIPGVPAKGEDGKDGS  
 PGEPGANGLPGAAG~~GER~~GAP~~GFR~~GAPGPNIPGEKGPA~~GER~~GAPGPA~~GPR~~GAAGEPGRDGVPPGGP~~GMR~~GM  
 PGSPGGPGSDGKPGPPGSQGESGRPGPPGPS~~GPR~~GQPGVMGFPGPKGNDGAPGKN~~GER~~GGPGGPGPQGP  
 GKNGETGPQGPPTGPGGDKGDTGPPGPQGLQLPGTGPPGENGKPEPGPKGDAGAPGAPGKGDA  
 GAP~~GER~~GPPGLAGAP~~GLR~~GGAGPPGPEGGKGAAGPPGPPGAAGTPGLQGMPP~~GER~~GGLGSPGPKGDKGEP  
 GPGADGVPGK~~DGPR~~GPTGPIGPPGAGQPGDKGEGGAPGLPGIA~~GPR~~GSP~~GER~~GETGPPGPAGFPAGAPGQ  
 NGEPGGK~~GER~~GAPGEKGEGGPPGVAGPPGSGPAGPPGPQGVK~~GER~~GSPGGPGAAGFP~~GARG~~LPGPPGSN  
 GNP~~GPP~~GPSGSPGKDGPAGNTGAPGSPGVSGPKGDAGQPGKEGSPGAQQPPGAPGLGIAGIT~~GARG~~L  
 AGPPGMP~~GPR~~GSPGPQGVKGESGKPGANGLS~~GER~~GPPGPQGLPGLAGTAGEPGRDGNPDSGLPGRDGS  
 GKG~~GDR~~GENGSPGAPGAPGHPGPPGPVGPAGKS~~GDR~~GESGPAGAPGPA~~GSR~~GAPGPQ~~GPR~~GDKGET~~G~~  
 ERGAAGIK~~GHR~~GFPGNPGAPGSPGPAQQAIGSPGPA~~GPR~~GPVGPSGPPGKDGTSGHPGPIGPP~~GPRGNRG~~  
 ERGSESGPHPGQPGPPGPPGAPGPC

III-30

**Figure S1.** Binding sites of HSP47 on collagen II (a) and collagen III (b) with the corresponding collagen sequences highlighted. All the GXR sequences are colored red. The sequences do not include post-translational modification of proline (P).

(a)

$G \times R^0$

GPMGPMGPRGPOGPAGAOGPQGFQGN  
 GPQGFQGNOGEOGEOGVSGPMGPRGPO  
 GPMGPRGPOGPOGKOGDDGEAGKOGKA  
 GEAGKOGKAGERGPOGPQGARGFOTGP  
 GARGFOTGTOGLOGVKGHRGYOGLDGAK  
 GESGSOGENSGOGPMGPRGLOGERGRT  
 GLOGERGRTGPAGAAGARGNDGQOGPA  
 GEOGPAGPQGAOGPAGEEGKRGARGEO  
 GKRGARGEOGGVGPPIGPOGERGAOGR  
 GERGAOGRGFOGQDGLAGPKGAOGER  
 GPKGAOGERGPSGLAGPKGANGDOGRO  
 GAOGEDGROGPOGPQARGQOGVMGFO  
 GKDGETGAAGPOGPAGPAGERGEQGAO  
 GEAGAOLVGPREGRGFOGERGSOGAO  
 GERGSOGAQGLQGPRLGLOGTOGTDGPK  
 GAQGPQGLQGMOGERGAAAGIAGPKGDR  
 GIAGPKGDRGDVGEKGPEGAOGKDGG  
 GAOGKDGRLTGPIGPOGPAGANGEK  
 GPAGANGEKGEVGPPOGPAGSARGAO  
 GSAGARGAOGERGGETGPPOGPAGFAGPO  
 GPSGAOGPQPTGVTGPKARGAQGP  
 GPSGKDGPKARGDSGPOGRAGEOGLQ  
 GLAGQRGIVGLOGQRERGFOGLOGPS  
 GFOGLOGPSGEOGKQGAOGASGDRGPO  
 GASGDRGPOGPVGPGLTGOAGEOGRE  
 GRDGAAGVKGDRGETGAVGAOGAOGPO  
 GAOGAOGPOGSPGPAGPTGKQGDREGEA  
 GKQGDREGEAAGQPMGPSGPAGARGIQ  
 GPAGARGIQGPQGPBGDKGEAGEOGER  
 GEAGEOGERGLKGHRGFTGLQLOGPO  
 GLQGLOGPOGPSGDQGASGPAGPSGPR  
 GPAGPSGPRGPOGPVGPSGKDANGIO  
 GKDGANGIOGPPIGPOGPRGRSGETGPA  
 GPRGRSGETGPAGPOGNOGPOGPOGPO

(b)

$G \times R^0$

GPSGPAGKDGESGROGROERGLOGPO  
 GFOGMKGHRGFDGRNGEKGETGAOGLK  
 GETGAOGLKGENGLOGENGAOGPMGPR  
 GAOGPMGPRGAOGERGROGLOGAAGAR  
 GLOGAARGARGNDGARGSDGQOGPOGPO  
 GAKGEVGPAGSOGSNGAOGORGEOGPO  
 GORGEOGPQGHAGAOGPOGPOGINGSO  
 GANGAOGLRGGAGEOGKNGAKGEOGPR  
 GAKGEOGPRGERGEAGIOGVOGAKGED  
 GANGLOGAARGERGGAOGFRGPAGPNGIO  
 GPAGPNGIOGEKGPAGERGAOGPAGPR  
 GAOGPAGPRGAAGEOGRDGVGGOGMR  
 GVGGOGMRGMOGSOGGOGSDGKOGPO  
 GSDGKOGPOGSQGESGROGPOGPSGPR  
 GPOGPSGPRGQOGVMGFOGPKGNDGAO  
 GPKGNDGAOGKNERGGOGGOGPOGPO  
 GGKGDAGAOGERGPOGLAGAOGLRGGA  
 GAAGPOGPOGAAGTOGLQGMORGGL  
 GMRGGLGSOGPKGDKGEOGGOGAD  
 GEOGGOGADGVGKDGPRGPTGPIGPO  
 GEGGAOGLGIAGPRGSGOGERGETGPO  
 GERGETGPPOGPAGFOGAOGQNGEOGK  
 QONGEOGKGERGGAOGEKGEGGPOGVA  
 GPOGPQGVKERGSGOGGOGAAGFOGAR  
 GAAGFOGARGLOGPOGSNGNOGPOGPS  
 GAOGPLGIAGITGARGLAGPOGMOGPR  
 GPOGMOGPRGSOGPQGVKGESGKOGAN  
 GESGKOGANGLSERGPOGPQGLOLA  
 GNOGSDGLOGRDGSOGGKGDRGENGSO  
 GDRGENGSOGAOGAOGHOGPOGPVGP  
 GPOGPVGPAGKSGDRGESGPAGPAGAO  
 GPAGPAGAOGPAGSRGAOGPAGPRGDK  
 GPQPRGDKGETGERGAAGIKGHRGFO  
 GIKGHRGFOGNOGAOGSOGPAGQQGAI  
 GPAGQQGAIGSOGPAGPRGPVGPSGPO  
 GPVGPSGPOGKDGTSGHOGPIGPOGPR  
 GPIGPOGPRGNRERGSEGSOGHOGQO  
 GERSEGSOGHOGQOGPOGPOGAOGPC

**Figure S2.** Sequences of 'GXR' containing collagen peptides from Toolkits II (a) and III (b). **O** represents **hydroxyproline**. For the sequences that contain more than one 'GXR' motif, we highlighted the most plausible motif according to the calculated results from of substitution at position -1 (Figure S4c).

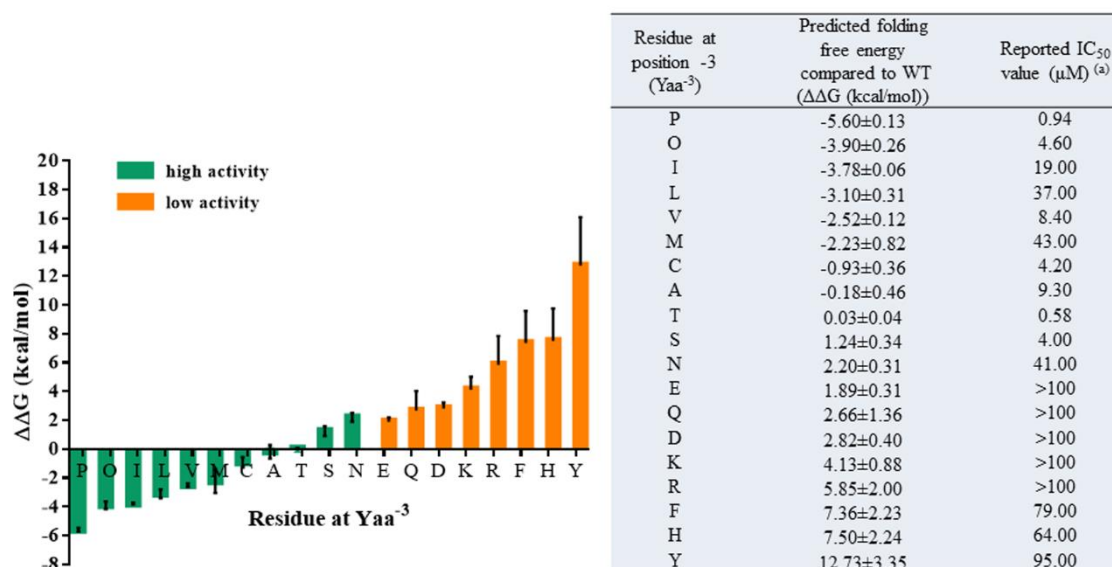

**Figure S3.** The predicted folding free energy of a serial of Yaa<sup>-3</sup>-substituted synthetic collagen-model peptides compared to peptide 8 (WT: POGP<sup>-7</sup>O<sup>-6</sup>GP<sup>-4</sup>T<sup>-3</sup>GP<sup>-1</sup>R<sup>0</sup>GPOGP<sup>0</sup>) binding of HSP47. Peptides with reported IC<sub>50</sub> values lower than 50  $\mu M$  are defined as high activity peptides (green), those higher than 50  $\mu M$  are defined as low activity peptides (orange).

<sup>a</sup> Reference. 31

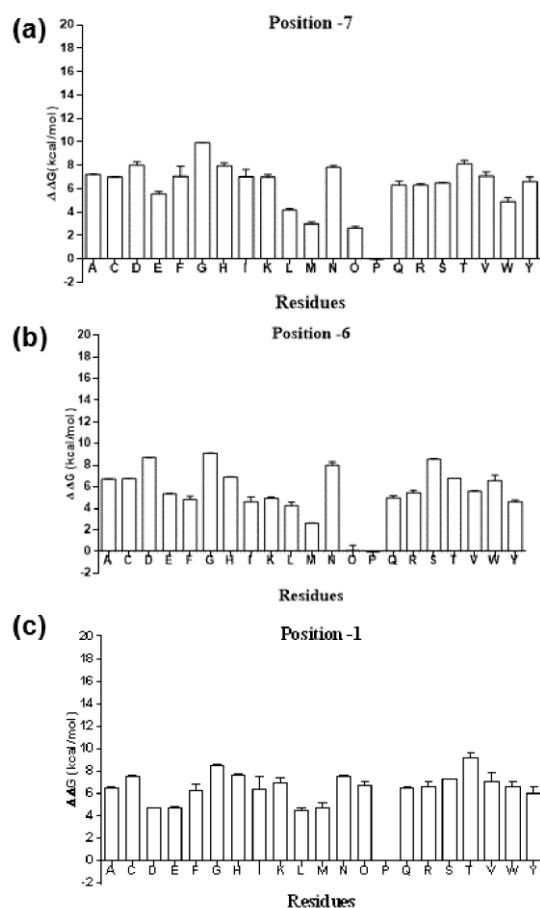

**Figure S4.** Predicted folding free energy changes for the substitutions at positions -7, -6 and -1 in CMP (PPGP-<sup>7</sup>P-<sup>6</sup>GP-<sup>4</sup>T-<sup>3</sup>GP-<sup>1</sup>R<sup>0</sup>GPPGPPG) on binding of HSP47. Data were shown as  $\Delta\Delta G \pm SD$  (kcal/mol) (n=5).

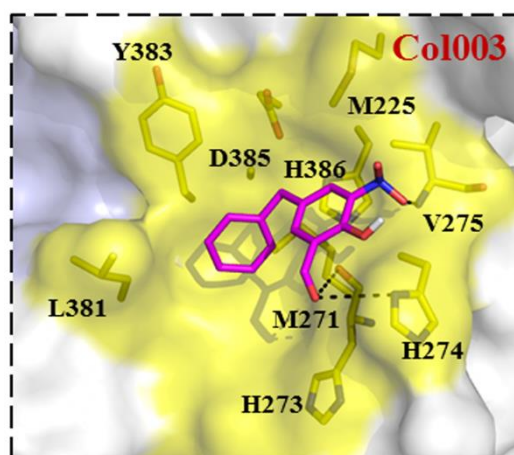

**Figure S5.** Predicted binding mode of Col003 to HSP47. HSP47 is shown as a colored surface. Residues of HSP47 that involved in interacting with the compounds are shown in sticks and labeled. Compound Col003 is shown in magenta sticks. The black dashed lines present hydrogen bonds.
